# Supplementary material for: Evolution of pharmacologic specificity in the pregnane X receptor
Source: Springer Nature journal article supplement (doi:10.1186/1471-2148-8-103), 2008-04-02
Supplement: Additional file 1 [file 1471-2148-8-103-s1.pdf]

## A. DNA-binding domain

|               |                                                               |
|---------------|---------------------------------------------------------------|
| PXR_human     | QICRVCGDKATGYHFNVTCEGCKGFFRRAMKRNARLRCPFKRGACEITRKTRRQCQACR   |
| PXR_mouse     | QICRVCGDKANGYHFNVTCEGCKGFFRRAMKRNVRLRCPFKRGTCETIRKTRRQCQACR   |
| PXR_rat       | QICRVCGDKANGYHFNVTCEGCKGFFRRAMKRNVRLRCPFKRGTCETIRKTRRQCQACR   |
| PXR_rabbit    | QTCRVCGDKANGYHFNVTCEGCKGFFRRTVKRNARLRCPFKRGACEITRKTRRQCQACR   |
| PXR_chicken   | KVCAVCGDRATGYHFHVMSCGCKGFFRRSILKGVHFTCPF-TRSCPITKAKRRQCQACR   |
| BXR-alpha     | KICRACGDRATGYHFNAMTCEGCKGFFRRAMKRNLRRLSCPF-QNSCVINKNNRRHCQACR |
| BXR-beta      | KICRACGDRATGYHFNAMTCEGCKGFFRRAMKRNLRRLSCPF-QNSCVINKNNRRHCQACR |
| PXR_xentrop   | KICRACGDRATGYHFNAMTCEGCKGFFRRAMKRKLQLSCPF-QNSCVINKSNRRHCQACR  |
| PXR_zebrafish | KICQVCGDKSTGYHFNAMTCEGCKGFCRRAMKRPAQLCCPF-QSACVITKSNRRQCQSCR  |
| VDR_PXR_Ciona | -----MHFGAITCEGCKGFFRRSVKKNASFSCAF-EKKCEINKNNRKHCQACR         |
|               |                                                               |
| PXR_human     | LRKCLES GM                                                    |
| PXR_mouse     | LRKCLES GM                                                    |
| PXR_rat       | LRKCLES GM                                                    |
| PXR_rabbit    | LRKCLES GM                                                    |
| PXR_chicken   | LQKCLDVGM                                                     |
| BXR-alpha     | LKKCLDIGM                                                     |
| BXR-beta      | LKKCLDIGM                                                     |
| PXR_xentrop   | LKKCLDIGM                                                     |
| PXR_zebrafish | LQKCLSIGM                                                     |
| VDR_PXR_Ciona | FNACLAAGM                                                     |

## B. Ligand-binding domain

|               |     |                                                                |                |                |
|---------------|-----|----------------------------------------------------------------|----------------|----------------|
|               |     | <u>Helix-1</u>                                                 |                |                |
| PXR_human     | 141 | QGLTEEQRMIRELMDAQMKTFDTTFSHFKNFRLPGVLSGCELPELQAP-SREEA-AK      |                |                |
| PXR_mouse     |     | QGLTEEQQALIQELMDAQMQTFDTTFSHFKDFRLPAVFHSGCELPEFLQAS-LLEDP-AT   |                |                |
| PXR_rat       |     | QGLTEEQQALIQELMDAQMQTFDTTFSHFKDFRLPAVFHSDCELPEVLQAS-LLEDP-AT   |                |                |
| PXR_rabbit    |     | QGLTGEQRMII EELMDAQMKTFDTTFSHFKNFRLPEVLGSGCEIPELQAL-TEEEA-GR   |                |                |
| PXR_chicken   |     | GGLTAEQQELISILIAAHKRTFDSSFSQFQHYQPAVRLC----IPGPCSQS-PPGPG-V    |                |                |
| BXR-alpha     |     | ASLTPEQQHFLTQLVGAHTKTFDFNFSTFSKNFRPIRRSSDPTQEPQAT-----         |                |                |
| BXR-beta      |     | ASLTPEQQHFITELVEAHTKTFDFNFSTFSKNFRPIRRSPDPTQDPQAT-----         |                |                |
| PXR_xentrop   |     | TSLTPEQQHFVTELAGAHTKTFDFNFSSFKNFRPIKRSSDPTQDPQAT-----*         |                |                |
| PXR_zebrafish |     | VTLTPQQEAVIQELLNAHKKTFDMTCAHFSQFRPLDRDQKSVSESSPLTNG-SWIDH-RP   |                |                |
| VDR_PXR_Ciona |     | TRMTMDEKLLVKTLKGRDSYDFAYVEYDTRFGREDGQOEIGNNTENPNG---LDA-AT     |                |                |
|               |     |                                                                |                |                |
|               |     | <u>Helix-3</u>                                                 |                |                |
| PXR_human     | 199 | WSQVRKDLCSLKVSLQL-RGEDGSVWNYKPP-----ADSGGKEIFSLLPHMADMSTYMFK   |                |                |
| PXR_mouse     |     | WSQIMKDRVPMKISLQL-RGEDGSIWNYQPP-----SKSDGKEIIPLLPHLADVSTYMFK   |                |                |
| PXR_rat       |     | WSQIMKDSVPMKISVQL-RGEDGSIWNYQPP-----SKSDGKEIIPLLPHLADVSTYMFK   |                |                |
| PXR_rabbit    |     | WRQIQEELGTMKLSLQL-RGEDGSVWNYTTP-----ADRSGKCLFSLLPHLADMSTYMFK   |                |                |
| PXR_chicken   |     | SASLSPQLDCLDEDVL-----PDVFSILPHFADLSTFMIQ                       |                |                |
| BXR-alpha     |     | -----SSEAFMLPHISDLVTYMIK                                       |                |                |
| BXR-beta      |     | -----SSEAFMLPHISDLFTYMLK                                       |                |                |
| PXR_xentrop   |     | -----SSGAFMLPHISDLITYMIK                                       |                |                |
| PXR_zebrafish |     | IAEDPMQWVFNPTSLSS-SSSSYQSLDNKEK-----KHFKSGN-FSSLPHFTDLTTYMIK   |                |                |
| VDR_PXR_Ciona |     | AVEAQSTTEDSGKQLHL-MLLFQHFLPIYP-----FSFDPKA-KQLFQHFCDIMTWGIR    |                |                |
|               |     |                                                                |                |                |
|               |     | <u>Helix-3</u>                                                 | <u>Helix-4</u> | <u>Helix-5</u> |
| PXR_human     | 253 | GIISFAKVISYFRDLPIEDQISLLKGAAFELCQLRFNTVFNAET-GTWECGR--LSY---C  |                |                |
| PXR_mouse     |     | GVINFAKVISYFRDLPIEDQISLLKGFATFEMCILRFNTMFDTET-GTWECGR--LAY---C |                |                |
| PXR_rat       |     | GVINFAKVISHFRELPIEDQISLLKGFATFEMCILRFNTMFDTET-GTWECGR--LAY---C |                |                |

|               |                                                                 |
|---------------|-----------------------------------------------------------------|
| PXR_rabbit    | GIINFAKVISYFRDLPIEDQISLLKGATLELCLLRFNTVFNAET-GTWECGR--LSY---C   |
| PXR_chicken   | QVIKFAKEIPAFRGLPIDDQISLLKGATLGICQIQFNTVFNEET-NAWECGQ--HCF---T   |
| BXR-alpha     | GIISFAKMLPYFKSLDIEDQIALLLKGSVAEVS VIRFNTVFNPDT-NTWECGP--FTY---D |
| BXR-beta      | GVISFAKMLPYFRSLAIEDQIALLLKGSVLEVCVIRFNRMFNPKT-NTWECGA--FTY---N  |
| PXR_xentrop   | GVISFAKMLPYFKSLNIEDQIALLLKGSVVEVCVIRFNTMFPET-NSWECGP--ITY---N   |
| PXR_zebrafish | NVINFGKTLTMFRALVMEDQISLLKGATFEIILIHFNMFNEVT-GIWECGP--LQY---C    |
| VDR_PXR_Ciona | KVIDYCKGIPQFVQLSIVDQIVLLRGGCLEMLVLRSYFAFSCNE-NKYMSDK--FQY---K   |

|               |     |                                                                                                                                                                                                                                |                |                |
|---------------|-----|--------------------------------------------------------------------------------------------------------------------------------------------------------------------------------------------------------------------------------|----------------|----------------|
|               |     | <u>Helix-7</u>                                                                                                                                                                                                                 | <u>Helix-8</u> | <u>Helix-9</u> |
| PXR_human     | 308 | <b>L</b> EDT-AGGF----QQLLLEP <b>M</b> LKFHYMLK <b>K</b> LQLH <b>E</b> EEYVLMQ <b>A</b> ISLFS <b>P</b> DRPGV <b>L</b> QHR <b>V</b>                                                                                              |                |                |
| PXR_mouse     |     | FEDP-NGGF----QKLLLDPLMKFHC <b>M</b> LK <b>K</b> LQLH <b>K</b> EEYVLMQ <b>A</b> ISLFS <b>P</b> DRPGV <b>V</b> Q <b>R</b> SV <b>V</b>                                                                                            |                |                |
| PXR_rat       |     | FEDP-NGGF----QKLLLDPLMKFHC <b>M</b> LK <b>K</b> LQLR <b>E</b> EEYVLMQ <b>A</b> ISLFS <b>P</b> DRPGV <b>V</b> Q <b>R</b> SV <b>V</b>                                                                                            |                |                |
| PXR_rabbit    |     | VEDP-EGGF----QQIYLEPL <b>L</b> KF <b>H</b> ISL <b>K</b> KLRLH <b>E</b> AEYVLLV <b>A</b> MLL <b>F</b> SPD <b>H</b> AS <b>V</b> T <b>Q</b> R <b>D</b> F <b>I</b>                                                                 |                |                |
| PXR_chicken   |     | IKDGALAGF----QQIYLEPL <b>L</b> KF <b>H</b> ISL <b>K</b> KLRLH <b>E</b> AEYVLLV <b>A</b> MLL <b>F</b> SPD <b>H</b> AS <b>V</b> T <b>Q</b> R <b>D</b> F <b>I</b>                                                                 |                |                |
| BXR-alpha     |     | TEDMFLAGF----RQLFLEPL <b>V</b> RI <b>H</b> RM <b>M</b> R <b>K</b> LN <b>L</b> Q <b>S</b> E <b>E</b> Y <b>A</b> MM <b>A</b> AL <b>S</b> IF <b>A</b> SD <b>R</b> PG <b>V</b> CD <b>W</b> E <b>K</b> I                            |                |                |
| BXR-beta      |     | ADDMTMAGF----SQQFLEPL <b>L</b> RI <b>H</b> CM <b>M</b> T <b>K</b> LN <b>L</b> E <b>S</b> E <b>A</b> Y <b>A</b> LM <b>A</b> T <b>M</b> AL <b>F</b> SS <b>D</b> R <b>P</b> GV <b>S</b> D <b>C</b> E <b>K</b> I                   |                |                |
| PXR_xentrop   |     | TEDMTMAGF----RQLFLEPL <b>L</b> RM <b>H</b> RM <b>M</b> R <b>K</b> LN <b>L</b> H <b>N</b> E <b>E</b> Y <b>A</b> LM <b>A</b> AM <b>A</b> L <b>F</b> AS <b>D</b> R <b>P</b> GV <b>Q</b> D <b>C</b> CK <b>I</b>                    |                |                |
| PXR_zebrafish |     | MDDAFRAGF----QHLLDP <b>M</b> MM <b>F</b> HY <b>T</b> LR <b>K</b> LR <b>L</b> H <b>E</b> EEYVLMQ <b>A</b> LSLFS <b>P</b> DRPG <b>V</b> T <b>D</b> H <b>K</b> V <b>I</b>                                                         |                |                |
| VDR_PXR_Ciona |     | PSDFLQAGG----NKEF <b>V</b> E <b>K</b> Y <b>N</b> SL <b>H</b> IR <b>M</b> R <b>K</b> M <b>K</b> LQ <b>V</b> E <b>E</b> IC <b>L</b> LL <b>L</b> AL <b>V</b> LF <b>S</b> PD <b>R</b> PG <b>L</b> E <b>D</b> Q <b>A</b> K <b>V</b> |                |                |

|               |     |                                                                                                                                                                                                                                                                                                                |                 |
|---------------|-----|----------------------------------------------------------------------------------------------------------------------------------------------------------------------------------------------------------------------------------------------------------------------------------------------------------------|-----------------|
|               |     | <u>Helix-9</u>                                                                                                                                                                                                                                                                                                 | <u>Helix-10</u> |
| PXR_human     | 363 | DQLQE <b>Q</b> FAITL <b>K</b> SYIE <b>C</b> NR-PQPA <b>H</b> R <b>F</b> FL <b>K</b> IM <b>A</b> ML <b>T</b> EL <b>R</b> SINA <b>Q</b> H <b>T</b> Q <b>R</b> LL <b>R</b> I <b>Q</b> DI <b>H</b> P <b>F</b> A                                                                                                    |                 |
| PXR_mouse     |     | DQLQ <b>E</b> R <b>F</b> AL <b>T</b> L <b>K</b> AYIE <b>C</b> SR-PYP <b>A</b> H <b>R</b> FL <b>F</b> L <b>K</b> IM <b>A</b> VL <b>T</b> EL <b>R</b> SINA <b>Q</b> Q <b>T</b> Q <b>Q</b> LL <b>R</b> I <b>Q</b> D <b>S</b> H <b>P</b> F <b>A</b>                                                                |                 |
| PXR_rat       |     | DQLQ <b>E</b> R <b>F</b> AL <b>T</b> L <b>K</b> AYIE <b>C</b> SR-PYP <b>A</b> H <b>R</b> FL <b>F</b> L <b>K</b> IM <b>A</b> VL <b>T</b> EL <b>R</b> SINA <b>Q</b> Q <b>T</b> Q <b>Q</b> LL <b>R</b> I <b>Q</b> D <b>T</b> H <b>P</b> F <b>A</b>                                                                |                 |
| PXR_rabbit    |     | DQLQ <b>E</b> R <b>F</b> AITL <b>K</b> AYIE <b>C</b> SR-PQ <b>P</b> TH <b>R</b> FL <b>F</b> L <b>K</b> IM <b>A</b> VL <b>T</b> EL <b>R</b> TINA <b>Q</b> H <b>T</b> Q <b>R</b> LL <b>R</b> I <b>Q</b> D <b>T</b> H <b>P</b> F <b>A</b>                                                                         |                 |
| PXR_chicken   |     | DQLQ <b>E</b> K <b>V</b> AL <b>T</b> L <b>K</b> SYID <b>H</b> R <b>H</b> -PM <b>P</b> E <b>G</b> R <b>F</b> L <b>Y</b> AK <b>L</b> LL <b>L</b> L <b>L</b> TEL <b>Q</b> T <b>L</b> K <b>M</b> EN <b>T</b> R <b>Q</b> IL <b>H</b> I <b>Q</b> D <b>L</b> SS <b>M</b> -                                            |                 |
| BXR-alpha     |     | Q <b>K</b> LQ <b>E</b> H <b>I</b> AL <b>T</b> L <b>K</b> D <b>F</b> IDS <b>Q</b> R <b>P</b> PS <b>L</b> Q <b>N</b> RL <b>L</b> Y <b>P</b> K <b>I</b> ME <b>C</b> L <b>T</b> EL <b>R</b> T <b>V</b> ND <b>I</b> HS <b>K</b> Q <b>L</b> LE <b>I</b> W <b>D</b> I <b>Q</b> P <b>D</b> A                           |                 |
| BXR-beta      |     | Q <b>N</b> LQ <b>E</b> H <b>I</b> AL <b>M</b> L <b>K</b> AF <b>I</b> ES <b>H</b> R <b>P</b> SP <b>Q</b> N <b>R</b> L <b>L</b> Y <b>P</b> K <b>I</b> ME <b>C</b> L <b>T</b> EL <b>R</b> T <b>I</b> ND <b>I</b> HS <b>K</b> Q <b>L</b> ME <b>I</b> W <b>D</b> I <b>Q</b> P <b>D</b> V                            |                 |
| PXR_xentrop   |     | Q <b>N</b> LQ <b>E</b> H <b>I</b> AL <b>M</b> L <b>K</b> RYIE <b>C</b> Q <b>R</b> PL <b>S</b> Q <b>N</b> RL <b>L</b> Y <b>P</b> K <b>I</b> ME <b>C</b> L <b>T</b> EL <b>R</b> T <b>V</b> ND <b>I</b> HS <b>K</b> Q <b>L</b> LE <b>I</b> W <b>D</b> I <b>Q</b> P <b>D</b> A                                     |                 |
| PXR_zebrafish |     | DR <b>N</b> Q <b>E</b> T <b>L</b> AL <b>T</b> L <b>K</b> TYIE <b>A</b> K <b>R</b> -NG <b>P</b> E <b>K</b> H <b>L</b> L <b>F</b> PK <b>I</b> MG <b>C</b> L <b>E</b> M <b>R</b> S <b>M</b> N <b>E</b> E <b>Y</b> T <b>K</b> Q <b>V</b> L <b>K</b> I <b>Q</b> D <b>M</b> Q <b>P</b> E <b>V</b>                    |                 |
| VDR_PXR_Ciona |     | E <b>Q</b> M <b>Q</b> D <b>C</b> V <b>A</b> N <b>T</b> L <b>Q</b> A <b>Y</b> E <b>Y</b> TH <b>K</b> -PP <b>N</b> ESS <b>F</b> L <b>Q</b> A <b>R</b> T <b>M</b> Y <b>C</b> L <b>P</b> IL <b>R</b> T <b>I</b> N <b>M</b> L <b>F</b> A <b>Q</b> N <b>I</b> M <b>S</b> L <b>Q</b> T <b>N</b> E <b>K</b> D <b>M</b> |                 |

|               |     |                                                              |
|---------------|-----|--------------------------------------------------------------|
| PXR_human     | 422 | T-PL <b>M</b> Q <b>E</b> LF <b>G</b> IT <b>G</b> S           |
| PXR_mouse     |     | T-PL <b>M</b> Q <b>E</b> LF <b>S</b> ST <b>D</b> G           |
| PXR_rat       |     | T-PL <b>M</b> Q <b>E</b> LF <b>S</b> ST <b>D</b> G           |
| PXR_rabbit    |     | T-PL <b>M</b> RE <b>L</b> F <b>S</b> T <b>T</b> D <b>D</b>   |
| PXR_chicken   |     | T-PL <b>L</b> SE <b>I</b> I <b>S</b>                         |
| BXR-alpha     |     | T-PL <b>M</b> RE <b>V</b> F <b>G</b> S <b>P</b> E            |
| BXR-beta      |     | T-PL <b>M</b> RE <b>V</b> F <b>G</b> SL <b>N</b> E           |
| PXR_xentrop   |     | T-PL <b>L</b> RE <b>V</b> F <b>G</b> SH <b>N</b> D           |
| PXR_zebrafish |     | S-PL <b>W</b> LE <b>I</b> I <b>S</b> K <b>D</b> T            |
| VDR_PXR_Ciona |     | N-PL <b>I</b> LE <b>V</b> N <b>N</b> S <b>A</b> D <b>E</b> D |

Additional file 1: Sequence alignment of (A) DNA-binding domain and (B) ligand-binding domain of PXR from diverse vertebrate species and chordate invertebrate *Ciona intestinalis*. The ligand-binding domain is annotated with the  $\alpha$ -helices [1]. Residues highlighted in **bold** are residues shown to contact ligand in crystal structures of human PXR bound to SR121813 [2, 3], hyperforin [4], rifampicin [5], T-0901317 [6], and 17 $\beta$ -estradiol [7]. Accession numbers are: human PXR [Genbank:AF061056], mouse PXR [Genbank:AF031814], rat PXR [Genbank:AF151377], rabbit PXR [Genbank:AF188476], chicken PXR [Genbank:AF276753], *Xenopus laevis* BXR $\alpha$  [Genbank:BC041187], *Xenopus laevis* BXR $\beta$  [Genbank:AF305201], *Xenopus tropicalis* PXR [Ensembl, <http://www.ensembl.com:ENSXETT00000039109>], zebrafish PXR [Genbank:AF454673, Genbank:AF502918], and *Ciona intestinalis* VDR/PXR [Genbank:BR000137].

## References

1. Moore LB, Maglich JM, McKee DD, Wisely B, Willson TM, Kliewer SA, Lambert MH, Moore JT: **Pregnane X receptor (PXR), constitutive androstane receptor (CAR), and benzoate X receptor (BXR) define three pharmacologically distinct classes of nuclear receptors.** *Mol Endocrinol*, 2002, **16(5)**:977-986.
2. Watkins RE, Davis-Searles PR, Lambert MH, Redinbo MR: **Coactivator binding promotes the specific interaction between ligand and the pregnane X receptor.** *J Mol Biol*, 2003, **331(4)**:815-828.
3. Watkins RE, Wisely GB, Moore LB, Collins JL, Lambert MH, Williams SP, Willson TM, Kliewer SA, Redinbo MR: **The human nuclear xenobiotic receptor PXR: structural determinants of directed promiscuity.** *Science*, 2001, **292(5525)**:2329-2333.
4. Watkins RE, Maglich JM, Moore LB, Wisely GB, Noble SM, Davis-Searles PR, Lambert MH, Kliewer SA, Redinbo MR: **2.1 Å crystal structure of human PXR in complex with the St. John's wort compound hyperforin.** *Biochemistry*, 2003, **42(6)**:1430-1438.
5. Chrencik JE, Orans J, Moore LB, Xue Y, Peng L, Collins JL, Wisely GB, Lambert MH, Kliewer SA, Redinbo MR: **Structural disorder in the complex of human PXR and the macrolide antibiotic rifampicin.** *Mol Endocrinol*, 2005, **19(5)**:1125-1134.
6. Xue Y, Chao E, Zuercher WJ, Willson TM, Collins JL, Redinbo MR: **Crystal structure of PXR-T1317 complex provides a scaffold to examine the potential for receptor antagonism.** *Bioorg Med Chem*, 2007, **15(5)**:2156-2166.
7. Xue Y, Moore LB, Orans J, Peng L, Bencharit S, Kliewer SA, Redinbo MR: **Crystal structure of PXR-estradiol complex provides insights into endobiotic recognition.** *Mol Endocrinol*, 2007, **21(5)**:1028-1038.
