# Supplementary material for: Evolution of pharmacologic specificity in the pregnane X receptor
Source: Springer Nature journal article supplement (doi:10.1186/1471-2148-8-103), 2008-04-02
Supplement: Additional file 5 [file 1471-2148-8-103-S5.pdf]

Additional file 5: Additional data for zebrafish PXR, *Xenopus tropicalis* PXR, and *Ciona intestinalis* VDR/PXR

| Compound                                  | Classification                                           | Source                                        | Effect on <i>Xenopus tropicalis</i> PXR | Effect on zebrafish PXR                  | Effect on <i>Ciona intestinalis</i> VDR/PXR |
|-------------------------------------------|----------------------------------------------------------|-----------------------------------------------|-----------------------------------------|------------------------------------------|---------------------------------------------|
| 25-Hydroxyvitamin D <sub>3</sub>          | Vitamin D receptor agonist                               | BIOMOL (Nuclear receptor ligand library # 1)  | No effect                               | No effect                                | No effect                                   |
| Retinoic acid, all trans                  | Retinoid X receptor agonist                              | BIOMOL (Nuclear receptor ligand library # 2)  | No effect                               | No effect                                | No effect                                   |
| 9- <i>cis</i> Retinoic acid               | Retinoic acid receptor agonist                           | BIOMOL (Nuclear receptor ligand library # 3)  | No effect                               | No effect                                | No effect                                   |
| 13- <i>cis</i> Retinoic acid              | Retinoic acid receptor agonist                           | BIOMOL (Nuclear receptor ligand library # 4)  | No effect                               | No effect                                | No effect                                   |
| 4-Hydroxyphenylretinamide                 | Retinoic acid receptor agonist                           | BIOMOL (Nuclear receptor ligand library # 5)  | No effect                               | No effect                                | No effect                                   |
| AM-580                                    | Retinoic acid receptor agonist                           | BIOMOL (Nuclear receptor ligand library # 6)  | No effect                               | No effect                                | No effect                                   |
| TTNPB                                     | Retinoic acid receptor agonist                           | BIOMOL (Nuclear receptor ligand library # 7)  | No effect                               | No effect                                | No effect                                   |
| Methoprene acid                           | Retinoid X receptor agonist                              | BIOMOL (Nuclear receptor ligand library # 8)  | No effect                               | No effect                                | No effect                                   |
| WY-14643                                  | Peroxisome proliferator-activated receptor agonist       | BIOMOL (Nuclear receptor ligand library # 9)  | No effect                               | No effect                                | No effect                                   |
| Ciglitazone                               | Peroxisome proliferator-activated receptor-gamma agonist | BIOMOL (Nuclear receptor ligand library # 10) | No effect                               | No effect                                | No effect                                   |
| Tetradecylthioacetic acid                 | Peroxisome proliferator-activated receptor agonist       | BIOMOL (Nuclear receptor ligand library # 11) | No effect                               | No effect                                | No effect                                   |
| 5,8,11,14-Eicosatetraenoic acid           | Peroxisome proliferator-activated receptor-alpha agonist | BIOMOL (Nuclear receptor ligand library # 12) | No effect                               | No effect                                | No effect                                   |
| 6-Formylindolo [3,2- <i>b</i> ] carbazole | Aryl hydroxycarbon receptor agonist                      | BIOMOL (Nuclear receptor ligand library # 13) | No effect                               | EC <sub>50</sub> =1.4, $\epsilon$ =1.28  | EC <sub>50</sub> =0.86, $\epsilon$ =1.28    |
| Dindolymethane                            | Aryl hydroxycarbon receptor agonist                      | BIOMOL (Nuclear receptor ligand library # 14) | No effect                               | No effect                                | No effect                                   |
| Acetyl-farnesyl-cysteine                  | Farnesoid                                                | BIOMOL (Nuclear receptor ligand library # 15) | No effect                               | No effect                                | No effect                                   |
| S-Farnesyl-L-cysteine methyl ester        | Farnesoid                                                | BIOMOL (Nuclear receptor ligand library # 16) | No effect                               | No effect                                | No effect                                   |
| Acetyl-geranylgeranyl-cysteine            | Farnesoid                                                | BIOMOL (Nuclear receptor ligand library # 17) | No effect                               | No effect                                | No effect                                   |
| Acetyl-geranyl-cysteine                   | Farnesoid                                                | BIOMOL (Nuclear receptor ligand library # 18) | No effect                               | No effect                                | No effect                                   |
| Farnesylthioacetic acid                   | Farnesoid                                                | BIOMOL (Nuclear receptor ligand library # 19) | No effect                               | No effect                                | No effect                                   |
| Bezafibrate                               | Peroxisome proliferator-activated receptor-alpha agonist | BIOMOL (Nuclear receptor ligand library # 20) | No effect                               | No effect                                | No effect                                   |
| LY 171883                                 | Peroxisome proliferator-activated receptor-gamma agonist | BIOMOL (Nuclear receptor ligand library # 21) | No effect                               | No effect                                | No effect                                   |
| 15-Deoxy-D12,14-prostaglandin J2          | Peroxisome proliferator-activated receptor-gamma agonist | BIOMOL (Nuclear receptor ligand library # 22) | No effect                               | No effect                                | No effect                                   |
| Troglitazone                              | Peroxisome proliferator-activated receptor-gamma agonist | BIOMOL (Nuclear receptor ligand library # 23) | No effect                               | No effect                                | No effect                                   |
| CITCO                                     | Constitutive androstane receptor agonist                 | BIOMOL (Nuclear receptor ligand library # 24) | No effect                               | No effect                                | No effect                                   |
| Paxilline                                 | Liver X receptor agonist                                 | BIOMOL (Nuclear receptor ligand library # 25) | No effect                               | No effect                                | No effect                                   |
| 24(S)-Hydroxycholesterol                  | Liver X receptor agonist                                 | BIOMOL (Nuclear receptor ligand library # 26) | No effect                               | No effect                                | No effect                                   |
| 24(S)-,25-Epoxycholesterol                | Liver X receptor agonist                                 | BIOMOL (Nuclear receptor ligand library # 27) | No effect                               | No effect                                | No effect                                   |
| Pregnenolone-16 $\alpha$ -carbonitrile    | Pregnane X receptor agonist                              | BIOMOL (Nuclear receptor ligand library # 28) | No effect                               | No effect                                | No effect                                   |
| Carbacynin                                | Peroxisome proliferator-activated receptor-delta agonist | BIOMOL (Nuclear receptor ligand library # 29) | No effect                               | No effect                                | No effect                                   |
| Clofibric acid                            | Peroxisome proliferator-activated receptor-alpha agonist | BIOMOL (Nuclear receptor ligand library # 30) | No effect                               | No effect                                | No effect                                   |
| BADGE                                     | Peroxisome proliferator-activated receptor-gamma agonist | BIOMOL (Nuclear receptor ligand library # 31) | No effect                               | No effect                                | No effect                                   |
| GW 9662                                   | Peroxisome proliferator-activated receptor-gamma agonist | BIOMOL (Nuclear receptor ligand library # 32) | No effect                               | No effect                                | No effect                                   |
| Gemfibrozil                               | Peroxisome proliferator-activated receptor-alpha agonist | BIOMOL (Nuclear receptor ligand library # 33) | No effect                               | No effect                                | No effect                                   |
| GW 7647                                   | Peroxisome proliferator-activated receptor-alpha agonist | BIOMOL (Nuclear receptor ligand library # 34) | No effect                               | No effect                                | No effect                                   |
| 3,5-Diiodo-L-thyronine                    | Thyroid hormone receptor agonist                         | BIOMOL (Nuclear receptor ligand library # 35) | No effect                               | No effect                                | No effect                                   |
| 3,5-Diiodo-L-tyroside dihydrate           | Thyroid hormone receptor agonist                         | BIOMOL (Nuclear receptor ligand library # 36) | No effect                               | No effect                                | No effect                                   |
| all-trans-Retinol                         | Retinoid                                                 | BIOMOL (Nuclear receptor ligand library # 37) | No effect                               | No effect                                | No effect                                   |
| 13- <i>cis</i> -Retinol                   | Retinoid                                                 | BIOMOL (Nuclear receptor ligand library # 38) | No effect                               | No effect                                | No effect                                   |
| Retinyl acetate                           | Retinoid                                                 | BIOMOL (Nuclear receptor ligand library # 39) | No effect                               | No effect                                | No effect                                   |
| 3,5-Diiodo-4-hydroxyphenylpropionic acid  | Thyroid hormone receptor agonist                         | BIOMOL (Nuclear receptor ligand library # 40) | No effect                               | No effect                                | No effect                                   |
| Cholic acid                               | Bile acid                                                | BIOMOL (Nuclear receptor ligand library # 41) | No effect                               | No effect                                | No effect                                   |
| Deoxycholic acid                          | Bile acid                                                | BIOMOL (Nuclear receptor ligand library # 42) | No effect                               | No effect                                | No effect                                   |
| Chenodeoxycholic acid                     | Bile acid                                                | BIOMOL (Nuclear receptor ligand library # 43) | No effect                               | No effect                                | No effect                                   |
| Glycocholic acid hydrate                  | Bile acid                                                | BIOMOL (Nuclear receptor ligand library # 44) | No effect                               | No effect                                | No effect                                   |
| Glycodeoxycholic acid monohydrate         | Bile acid                                                | BIOMOL (Nuclear receptor ligand library # 45) | No effect                               | No effect                                | No effect                                   |
| Taurocholic acid sodium salt              | Bile acid                                                | BIOMOL (Nuclear receptor ligand library # 46) | No effect                               | No effect                                | No effect                                   |
| Taurodeoxycholic acid sodium salt         | Bile acid                                                | BIOMOL (Nuclear receptor ligand library # 47) | No effect                               | No effect                                | No effect                                   |
| Rifampicin                                | Pregnane X receptor agonist                              | BIOMOL (Nuclear receptor ligand library # 48) | No effect                               | No effect                                | No effect                                   |
| Dexamethasone                             | Pregnane steroid                                         | BIOMOL (Nuclear receptor ligand library # 49) | No effect                               | No effect                                | No effect                                   |
| Lithocholic acid                          | Bile acid                                                | BIOMOL (Nuclear receptor ligand library # 50) | No effect                               | No effect                                | No effect                                   |
| 5 $\beta$ -Pregnan-3,20-dione             | Pregnane steroid                                         | BIOMOL (Nuclear receptor ligand library # 51) | No effect                               | EC <sub>50</sub> =0.83, $\epsilon$ =0.85 | No effect                                   |
| Hyperforin                                | Pregnane X receptor agonist                              | BIOMOL (Nuclear receptor ligand library # 52) | No effect                               | No effect                                | No effect                                   |
| Farnesol                                  | Farnesoid                                                | BIOMOL (Nuclear receptor ligand library # 53) | No effect                               | EC <sub>50</sub> =20.6, $\epsilon$ =0.43 | No effect                                   |
| 3 $\alpha$ ,5 $\alpha$ -Androstenol       | Androstane steroid                                       | BIOMOL (Nuclear receptor ligand library # 54) | No effect                               | EC <sub>50</sub> =3.6, $\epsilon$ =1.02  | No effect                                   |

| Compound                                                                                       | Classification                                           | Source                                        | Effect on <i>Xenopus tropicalis</i> PXR | Effect on zebrafish PXR                                 | Effect on <i>Ciona intestinalis</i> VDR/PXR |
|------------------------------------------------------------------------------------------------|----------------------------------------------------------|-----------------------------------------------|-----------------------------------------|---------------------------------------------------------|---------------------------------------------|
| 3 $\alpha$ ,5 $\alpha$ -Androstanol                                                            | Androstane steroid                                       | BIOMOL (Nuclear receptor ligand library # 55) | No effect                               | <b>EC<sub>50</sub>=4.6, <math>\epsilon</math>=1.0</b>   | No effect                                   |
| Z-Guggulsterone                                                                                | Farnesoid X receptor antagonist                          | BIOMOL (Nuclear receptor ligand library # 56) | No effect                               | No effect                                               | No effect                                   |
| TCPOBOP                                                                                        | Constitutive androstane receptor agonist                 | BIOMOL (Nuclear receptor ligand library # 57) | No effect                               | No effect                                               | No effect                                   |
| N-Oleoylethanolamide                                                                           | Peroxisome proliferator-activated receptor-alpha agonist | BIOMOL (Nuclear receptor ligand library # 58) | No effect                               | No effect                                               | No effect                                   |
| LY 295427                                                                                      | Low density lipoprotein receptor up-regulator            | BIOMOL (Nuclear receptor ligand library # 59) | No effect                               | No effect                                               | No effect                                   |
| Geranygeraniol                                                                                 | Farnesoid                                                | BIOMOL (Nuclear receptor ligand library # 60) | No effect                               | No effect                                               | No effect                                   |
| 6 $\alpha$ -Fluorotestosterone                                                                 | Androstane steroid                                       | BIOMOL (Nuclear receptor ligand library # 61) | No effect                               | No effect                                               | No effect                                   |
| Tamoxifen                                                                                      | Estrogen receptor antagonist                             | BIOMOL (Nuclear receptor ligand library # 62) | No effect                               | No effect                                               | No effect                                   |
| Mifepristone                                                                                   | Progesterone receptor antagonist                         | BIOMOL (Nuclear receptor ligand library # 63) | No effect                               | No effect                                               | No effect                                   |
| Estrone                                                                                        | Estrane steroid                                          | BIOMOL (Nuclear receptor ligand library # 64) | No effect                               | No effect                                               | No effect                                   |
| 13(S)-Hydroxy-9Z,11E-octadecadienoic acid                                                      | Peroxisome proliferator-activated receptor-gamma agonist | BIOMOL (Nuclear receptor ligand library # 65) | No effect                               | No effect                                               | No effect                                   |
| Cortisone                                                                                      | Pregnane steroid                                         | BIOMOL (Nuclear receptor ligand library # 66) | No effect                               | No effect                                               | No effect                                   |
| Progesterone                                                                                   | Pregnane steroid                                         | BIOMOL (Nuclear receptor ligand library # 67) | No effect                               | No effect                                               | No effect                                   |
| 17 $\beta$ -Estradiol                                                                          | Estrane steroid                                          | BIOMOL (Nuclear receptor ligand library # 68) | No effect                               | No effect                                               | No effect                                   |
| Pregnenolone                                                                                   | Pregnane steroid                                         | BIOMOL (Nuclear receptor ligand library # 69) | No effect                               | <b>EC<sub>50</sub>=0.48, <math>\epsilon</math>=2.05</b> | No effect                                   |
| Androstenedione                                                                                | Androstane steroid                                       | BIOMOL (Nuclear receptor ligand library # 70) | No effect                               | <b>EC<sub>50</sub>=3.6, <math>\epsilon</math>=0.14</b>  | No effect                                   |
| 1 $\alpha$ ,25-Dihydroxyvitamin D <sub>3</sub>                                                 | Vitamin D receptor agonist                               | BIOMOL (Nuclear receptor ligand library # 71) | No effect                               | No effect                                               | No effect                                   |
| Docosa-4Z,7Z,10Z,13Z,16Z,19Z-hexanoic acid                                                     | Retinoid X receptor agonist                              | BIOMOL (Nuclear receptor ligand library # 72) | No effect                               | No effect                                               | No effect                                   |
| 3-Methylcholanthrene                                                                           | Aryl hydroxycarbon receptor agonist                      | BIOMOL (Nuclear receptor ligand library # 73) | No effect                               | No effect                                               | No effect                                   |
| Aciretin                                                                                       | Retinoid                                                 | BIOMOL (Nuclear receptor ligand library # 74) | No effect                               | No effect                                               | No effect                                   |
| Pioglitazone HCl                                                                               | Peroxisome proliferator-activated receptor-gamma agonist | BIOMOL (Nuclear receptor ligand library # 75) | No effect                               | No effect                                               | No effect                                   |
| 4-Hydroxretinoic acid                                                                          | Retinoid                                                 | BIOMOL (Nuclear receptor ligand library # 76) | No effect                               | No effect                                               | No effect                                   |
| 12-Ketolithocholic acid                                                                        | Bile acid                                                | Steraloids                                    | No effect                               | No effect                                               | No effect                                   |
| 16,(5 $\alpha$ )-Androsten-3 $\beta$ -ol                                                       | Androstane steroid                                       | Steraloids                                    | No effect                               | No effect                                               | No effect                                   |
| 16,(5 $\alpha$ )-Androsten-3-one                                                               | Androstane steroid                                       | Steraloids                                    | No effect                               | No effect                                               | No effect                                   |
| 16 $\alpha$ -Hydroxyestrone                                                                    | Estrane steroid                                          | Steraloids                                    | No effect                               | No effect                                               | No effect                                   |
| 17-Hydroxypregnenolone                                                                         | Pregnane steroid                                         | Steraloids                                    | No effect                               | No effect                                               | No effect                                   |
| 17-Hydroxyprogesterone                                                                         | Pregnane steroid                                         | Steraloids                                    | No effect                               | No effect                                               | No effect                                   |
| 23-Nordeoxycholic acid                                                                         | Bile acid                                                | Steraloids                                    | No effect                               | No effect                                               | No effect                                   |
| 2-Hydroxyestrone                                                                               | Estrane steroid                                          | Steraloids                                    | No effect                               | No effect                                               | No effect                                   |
| 4,16-Androstadien-3-one                                                                        | Androstane steroid                                       | Steraloids                                    | No effect                               | No effect                                               | No effect                                   |
| 4-Androsten-17 $\alpha$ -3-one glucosiduronate                                                 | Androstane steroid                                       | Steraloids                                    | No effect                               | No effect                                               | No effect                                   |
| 4-Androsten-17 $\alpha$ -ol-3-one sulfate                                                      | Androstane steroid                                       | Steraloids                                    | No effect                               | No effect                                               | No effect                                   |
| 4-Methoxyestrone                                                                               | Estrane steroid                                          | Steraloids                                    | No effect                               | No effect                                               | No effect                                   |
| 4-Pregnen-17,20 $\beta$ -diol-3-one sulfate                                                    | Pregnane steroid                                         | Steraloids                                    | No effect                               | No effect                                               | No effect                                   |
| 5,16-Androstadien-3 $\beta$ -ol                                                                | Androstane steroid                                       | Steraloids                                    | No effect                               | No effect                                               | No effect                                   |
| 5 $\alpha$ -Androstan-3,17-dione (androstanedione)                                             | Androstane steroid                                       | Steraloids                                    | No effect                               | No effect                                               | No effect                                   |
| 5 $\alpha$ -Androstan-3 $\alpha$ ,17 $\beta$ -diol (dihydroandrosterone)                       | Androstane steroid                                       | Steraloids                                    | No effect                               | No effect                                               | No effect                                   |
| 5 $\alpha$ -Androstan-3 $\beta$ -ol                                                            | Androstane steroid                                       | Steraloids                                    | No effect                               | No effect                                               | No effect                                   |
| 5 $\alpha$ -Cholestan-3 $\alpha$ ,7 $\alpha$ ,16 $\alpha$ ,27-tetrol (5 $\alpha$ -myxinol)     | Bile alcohol                                             | Lee Hagey                                     | No effect                               | No effect                                               | No effect                                   |
| 5 $\alpha$ -Pregnan-3 $\alpha$ ,11 $\beta$ ,21-triol-20-one                                    | Pregnane steroid                                         | Steraloids                                    | No effect                               | No effect                                               | No effect                                   |
| 5 $\beta$ -Androstan-3 $\alpha$ ,11 $\beta$ -17-one                                            | Androstane steroid                                       | Steraloids                                    | No effect                               | No effect                                               | No effect                                   |
| 5 $\beta$ -Androstan-3 $\alpha$ -ol-11,17-one                                                  | Pregnane steroid                                         | Steraloids                                    | No effect                               | No effect                                               | No effect                                   |
| 5 $\beta$ -Androstan-3 $\beta$ -ol                                                             | Androstane steroid                                       | Steraloids                                    | No effect                               | No effect                                               | No effect                                   |
| 5 $\beta$ -Cholan-3 $\alpha$ ,7 $\alpha$ ,12 $\alpha$ ,24-tetrol                               | Bile alcohol                                             | Steraloids                                    | No effect                               | No effect                                               | No effect                                   |
| 5 $\beta$ -Cholan-3 $\alpha$ ,7 $\alpha$ ,12 $\alpha$ -triol                                   | Bile salt intermediate                                   | Steraloids                                    | No effect                               | No effect                                               | No effect                                   |
| 5 $\beta$ -Cholestan-3 $\alpha$ ,7 $\alpha$ ,12 $\alpha$ ,24,26,27-tetrol (5 $\beta$ -scymnol) | Bile alcohol                                             | Lee Hagey                                     | No effect                               | No effect                                               | No effect                                   |
| 5 $\beta$ -Pregnan-3 $\alpha$ ,20 $\alpha$ -diol                                               | Pregnane steroid                                         | Steraloids                                    | No effect                               | No effect                                               | No effect                                   |
| 5 $\beta$ -Pregnan-3 $\alpha$ ,20 $\beta$ -diol                                                | Pregnane steroid                                         | Steraloids                                    | No effect                               | No effect                                               | No effect                                   |
| 5 $\beta$ -Pregnan-3 $\alpha$ -ol-20-one                                                       | Pregnane steroid                                         | Steraloids                                    | No effect                               | No effect                                               | No effect                                   |
| 5 $\beta$ -scymnol 27-sulfate                                                                  | Bile alcohol                                             | Lee Hagey                                     | No effect                               | No effect                                               | No effect                                   |
| 5-Pregnen-3 $\beta$ ,17-diol 3-sulfate                                                         | Pregnane steroid                                         | Steraloids                                    | No effect                               | No effect                                               | No effect                                   |
| 7,12-Diketolithocholic acid                                                                    | Bile acid                                                | Steraloids                                    | No effect                               | No effect                                               | No effect                                   |
| 7-Ketodeoxycholic acid                                                                         | Bile acid                                                | Steraloids                                    | No effect                               | No effect                                               | No effect                                   |
| 7-Ketolithocholic acid                                                                         | Bile acid                                                | Steraloids                                    | No effect                               | No effect                                               | No effect                                   |
| Acetaminophen                                                                                  | Xenobiotic                                               | Sigma                                         | No effect                               | No effect                                               | No effect                                   |
| Aldosterone                                                                                    | Pregnane steroid                                         | Steraloids                                    | No effect                               | No effect                                               | No effect                                   |

| Compound                                                                    | Classification                                        | Source                     | Effect on <i>Xenopus tropicalis</i> PXR                 | Effect on zebrafish PXR                                 | Effect on <i>Ciona intestinalis</i> VDR/PXR                |
|-----------------------------------------------------------------------------|-------------------------------------------------------|----------------------------|---------------------------------------------------------|---------------------------------------------------------|------------------------------------------------------------|
| Allocholic acid                                                             | Bile acid                                             | Toronto Research Chemicals | No effect                                               | No effect                                               | No effect                                                  |
| Allopregnanolone (5 $\alpha$ -pregnan-3 $\alpha$ ,20 $\alpha$ -diol)        | Pregnane steroid                                      | Steraloids                 | No effect                                               | No effect                                               | No effect                                                  |
| Allopregnanolone (5 $\alpha$ -pregnan-3 $\alpha$ -ol-20-one)                | Pregnane steroid                                      | Steraloids                 | No effect                                               | No effect                                               | No effect                                                  |
| Alpha-tocopherol                                                            | Vitamin E derivative                                  | EMD                        | No effect                                               | No effect                                               | No effect                                                  |
| $\alpha$ -Muricholic acid                                                   | Bile acid                                             | Steraloids                 | No effect                                               | No effect                                               | No effect                                                  |
| Androsterone                                                                | Androstane steroid                                    | Steraloids                 | No effect                                               | No effect                                               | No effect                                                  |
| Beta-carotene                                                               | Vitamin                                               | EMD                        | No effect                                               | No effect                                               | No effect                                                  |
| Beta-sitosterol                                                             | Cholesterol derivative                                | Steraloids                 | No effect                                               | No effect                                               | No effect                                                  |
| Beta-tocopherol                                                             | Vitamin E derivative                                  | EMD                        | No effect                                               | No effect                                               | No effect                                                  |
| $\beta$ -Muricholic acid                                                    | Bile acid                                             | Steraloids                 | No effect                                               | No effect                                               | No effect                                                  |
| Caffeine                                                                    | Xenobiotic                                            | Sigma                      | No effect                                               | No effect                                               | No effect                                                  |
| Campesterol                                                                 | Cholesterol derivative                                | Steraloids                 | No effect                                               | No effect                                               | No effect                                                  |
| Carbamazepine                                                               | Xenobiotic                                            | Sigma                      | No effect                                               | No effect                                               | <b>EC<sub>50</sub> &gt; 10, <math>\epsilon</math>~0.10</b> |
| Chlorzoxazone                                                               | Xenobiotic                                            | Sigma                      | No effect                                               | No effect                                               | No effect                                                  |
| Cholestanol sulfate (5 $\alpha$ -cholestan-3 $\beta$ -ol sulfate)           | Cholesterol derivative                                | Steraloids                 | No effect                                               | No effect                                               | No effect                                                  |
| Cholesteryl sulfate (5-cholesten-3 $\beta$ -ol)                             | Cholesterol derivative                                | Steraloids                 | No effect                                               | No effect                                               | No effect                                                  |
| Clotrimazole                                                                | Xenobiotic                                            | Sigma                      | No effect                                               | No effect                                               | No effect                                                  |
| Cortexolone (4-Pregnen-17,21-diol-3,20-dione)                               | Pregnane steroid                                      | Steraloids                 | No effect                                               | No effect                                               | No effect                                                  |
| Cortexone (4-Pregnen-21-ol-3,20-dione)                                      | Pregnane steroid                                      | Steraloids                 | No effect                                               | No effect                                               | No effect                                                  |
| Corticosterone                                                              | Pregnane steroid                                      | Steraloids                 | No effect                                               | No effect                                               | No effect                                                  |
| Cortisol                                                                    | Pregnane steroid                                      | Steraloids                 | No effect                                               | No effect                                               | No effect                                                  |
| Cortol                                                                      | Pregnane steroid                                      | Steraloids                 | No effect                                               | No effect                                               | No effect                                                  |
| Cortolone                                                                   | Pregnane steroid                                      | Steraloids                 | No effect                                               | No effect                                               | No effect                                                  |
| Cycloartenol                                                                | Plant steroid                                         | Steraloids                 | No effect                                               | No effect                                               | No effect                                                  |
| Cyclosporine                                                                | Xenobiotic                                            | Sigma                      | No effect                                               | No effect                                               | No effect                                                  |
| DHEA                                                                        | Androstane steroid                                    | Steraloids                 | No effect                                               | No effect                                               | No effect                                                  |
| DHEA sulfate                                                                | Androstane steroid                                    | Steraloids                 | No effect                                               | No effect                                               | No effect                                                  |
| Dihydrotestosterone                                                         | Androstane steroid                                    | Steraloids                 | No effect                                               | No effect                                               | No effect                                                  |
| Ecdysone                                                                    | Ecdysone receptor agonist                             | Steraloids                 | No effect                                               | No effect                                               | No effect                                                  |
| Epiandrosterone (5 $\alpha$ -androstan-3 $\beta$ -ol-17-one)                | Pregnane steroid                                      | Steraloids                 | No effect                                               | No effect                                               | No effect                                                  |
| Epicoprostanol sulfate (5 $\beta$ -cholestan-3 $\alpha$ -ol sulfate)        | Cholesterol derivative                                | Steraloids                 | No effect                                               | No effect                                               | No effect                                                  |
| Epitestosterone                                                             | Androstane steroid                                    | Steraloids                 | No effect                                               | No effect                                               | No effect                                                  |
| Epitestosterone 17-glucuronide                                              | Androstane steroid                                    | Steraloids                 | No effect                                               | No effect                                               | No effect                                                  |
| Epitestosterone 17-sulfate                                                  | Androstane steroid                                    | Steraloids                 | No effect                                               | No effect                                               | No effect                                                  |
| Estetrol                                                                    | Estrane steroid                                       | Steraloids                 | No effect                                               | No effect                                               | No effect                                                  |
| Estradiol 3-glucuronide                                                     | Estrane steroid                                       | Steraloids                 | No effect                                               | No effect                                               | No effect                                                  |
| Estradiol 3-sulfate                                                         | Estrane steroid                                       | Steraloids                 | No effect                                               | No effect                                               | No effect                                                  |
| Estriol                                                                     | Estrane steroid                                       | Steraloids                 | No effect                                               | No effect                                               | No effect                                                  |
| Estrone 3-sulfate                                                           | Estrane steroid                                       | Steraloids                 | No effect                                               | No effect                                               | No effect                                                  |
| Ethinyl estradiol                                                           | Estrane steroid (synthetic)                           | Steraloids                 | No effect                                               | No effect                                               | No effect                                                  |
| Etiocholanolone                                                             | Androstane steroid                                    | Steraloids                 | No effect                                               | No effect                                               | No effect                                                  |
| Flurbiprofen                                                                | Xenobiotic                                            | Sigma                      | No effect                                               | No effect                                               | No effect                                                  |
| Glycochenodeoxycholic acid                                                  | Bile acid                                             | Sigma                      | No effect                                               | No effect                                               | No effect                                                  |
| Glycodeoxycholic acid                                                       | Bile acid                                             | Steraloids                 | No effect                                               | No effect                                               | No effect                                                  |
| GW3965                                                                      | Liver X receptor agonist                              | Sigma                      | No effect                                               | No effect                                               | No effect                                                  |
| Hyodeoxycholic acid (5 $\beta$ -Cholanic acid-3 $\alpha$ ,6 $\alpha$ -diol) | Bile acid                                             | Steraloids                 | No effect                                               | No effect                                               | No effect                                                  |
| Ketoconazole                                                                | Xenobiotic                                            | Sigma                      | No effect                                               | No effect                                               | No effect                                                  |
| Lanosterol                                                                  | Cholesterol derivative                                | Steraloids                 | No effect                                               | No effect                                               | No effect                                                  |
| Lathosterol                                                                 | Cholesterol derivative                                | Steraloids                 | No effect                                               | No effect                                               | No effect                                                  |
| Levonorgestrol                                                              | Progesterone receptor agonist                         | Steraloids                 | No effect                                               | No effect                                               | No effect                                                  |
| Murocholic acid (5 $\beta$ -Cholanic acid-3 $\alpha$ ,6 $\beta$ -diol)      | Bile acid                                             | Steraloids                 | No effect                                               | No effect                                               | No effect                                                  |
| Mycophenolic acid                                                           | Xenobiotic                                            | Sigma                      | No effect                                               | No effect                                               | No effect                                                  |
| n-Butyl 4-aminobenzoate                                                     | Pregnane X receptor agonist ( <i>Xenopus laevis</i> ) | Sigma                      | <b>EC<sub>50</sub>=14.4, <math>\epsilon</math>=0.89</b> | <b>EC<sub>50</sub>=13.9, <math>\epsilon</math>=0.69</b> | <b>EC<sub>50</sub>=16.5, <math>\epsilon</math>=0.54</b>    |
| Nifedipine                                                                  | Xenobiotic                                            | Sigma                      | No effect                                               | No effect                                               | No effect                                                  |
| Norethindrone                                                               | Progesterone receptor agonist                         | Steraloids                 | No effect                                               | No effect                                               | No effect                                                  |
| n-Propyl 4-hydroxybenzoate                                                  | Pregnane X receptor agonist ( <i>Xenopus laevis</i> ) | Sigma                      | <b>EC<sub>50</sub>=34.9, <math>\epsilon</math>=1.0</b>  | <b>EC<sub>50</sub>=48.6, <math>\epsilon</math>=0.54</b> | No effect                                                  |
| Paclitaxel                                                                  | Xenobiotic                                            | Sigma                      | No effect                                               | No effect                                               | No effect                                                  |

| Compound                                                                | Classification                           | Source     | Effect on <i>Xenopus tropicalis</i> PXR | Effect on zebrafish PXR | Effect on <i>Ciona intestinalis</i> VDR/PXR |
|-------------------------------------------------------------------------|------------------------------------------|------------|-----------------------------------------|-------------------------|---------------------------------------------|
| Phenobarbital                                                           | Constitutive androstane receptor agonist | Sigma      | No effect                               | No effect               | No effect                                   |
| Pregnanediol glucuronide                                                | Pregnane steroid                         | Steraloids | No effect                               | No effect               | No effect                                   |
| Pregnanolone sulfate (5 $\beta$ -pregnan-3 $\alpha$ -ol-20-one sulfate) | Pregnane steroid                         | Steraloids | No effect                               | No effect               | No effect                                   |
| Pregnenolone sulfate                                                    | Pregnane steroid                         | Steraloids | No effect                               | No effect               | No effect                                   |
| Reserpine                                                               | Xenobiotic                               | Sigma      | No effect                               | No effect               | No effect                                   |
| Retinol                                                                 | Vitamin A derivative                     | Sigma      | No effect                               | No effect               | No effect                                   |
| SR12813                                                                 | Pregnane X receptor agonist              | Sigma      | No effect                               | No effect               | No effect                                   |
| Taurochenodeoxycholic acid                                              | Bile acid                                | Sigma      | No effect                               | No effect               | No effect                                   |
| Taurohyodeoxycholic acid                                                | Bile acid                                | Steraloids | No effect                               | No effect               | No effect                                   |
| Testosterone                                                            | Androstane steroid                       | Steraloids | No effect                               | No effect               | No effect                                   |
| Tetrahydrocortisol                                                      | Pregnane steroid                         | Steraloids | No effect                               | No effect               | No effect                                   |
| Tetrahydrocortisone                                                     | Pregnane steroid                         | Steraloids | No effect                               | No effect               | No effect                                   |
| Vitamin K2                                                              | Vitamin K derivative                     | Sigma      | No effect                               | No effect               | No effect                                   |
| Vitamin K3                                                              | Vitamin K derivative                     | Sigma      | No effect                               | No effect               | No effect                                   |
| $\omega$ -Muricholic acid                                               | Bile acid                                | Steraloids | No effect                               | No effect               | No effect                                   |
